# Supplementary material for: Flexibility and resilience of great tit (Parus major) gut microbiomes to changing diets
Source: PubMed Central journal article supplement (PMC7893775; doi:10.1186/s42523-021-00076-6), 2021-02-18
Supplement: 42523_2021_76_MOESM5_ESM.pdf [file 42523_2021_76_MOESM5_ESM.pdf]

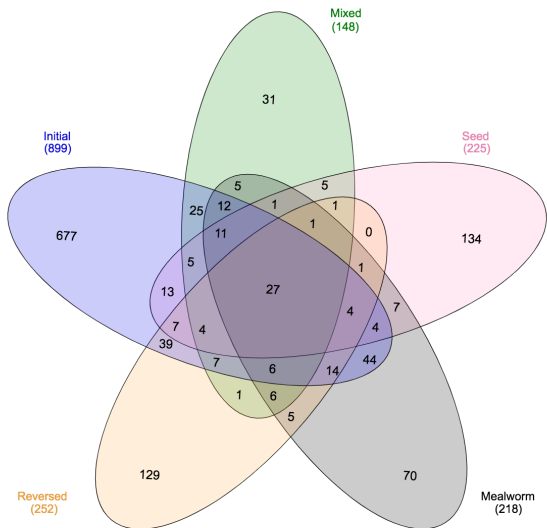

Pairwise shared number of ASVs between different groups

|          |          |         |       |      |
|----------|----------|---------|-------|------|
| Initial  | 108      |         |       |      |
| Mixed    | 53       | 97      |       |      |
| Seed     | 45       | 75      | 58    |      |
| Mealworm | 64       | 122     | 71    | 58   |
|          | Reversed | Initial | Mixed | Seed |
