# Supplementary material for: Flexibility and resilience of great tit (Parus major) gut microbiomes to changing diets
Source: PubMed Central journal article supplement (PMC7893775; doi:10.1186/s42523-021-00076-6), 2021-02-18

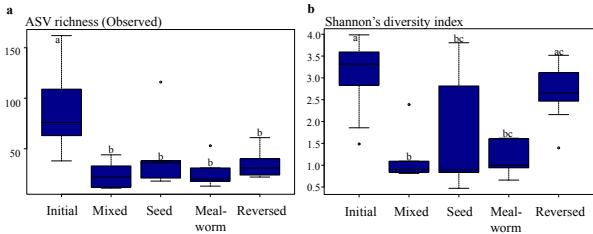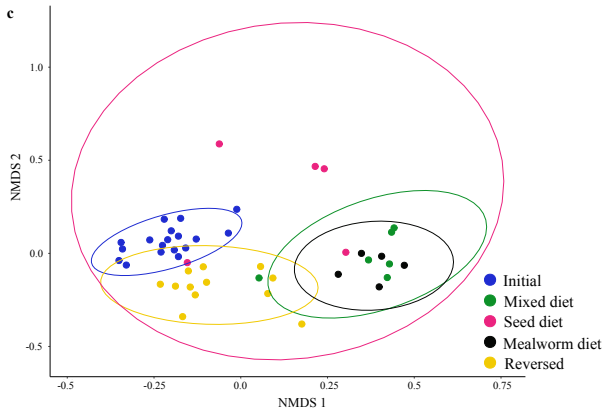

Community level differences  
(pairwiseAdonis with  
10,000 permutations)

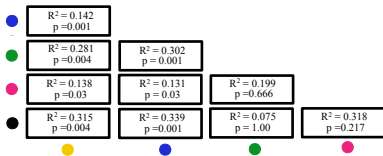

Supplement: 42523_2021_76_MOESM7_ESM.pdf [file 42523_2021_76_MOESM7_ESM.pdf]
