# Supplementary material for: Flexibility and resilience of great tit (Parus major) gut microbiomes to changing diets
Source: PubMed Central journal article supplement (PMC7893775; doi:10.1186/s42523-021-00076-6), 2021-02-18
Supplement: 42523_2021_76_MOESM8_ESM.pdf [file 42523_2021_76_MOESM8_ESM.pdf]

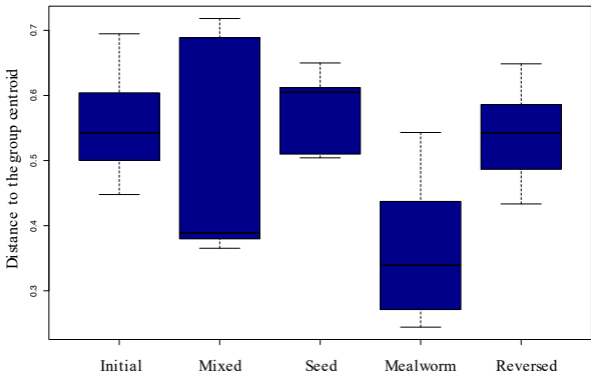

Pairwise differences in distance to the group centroid

|          |                   |                   |            |                   |
|----------|-------------------|-------------------|------------|-------------------|
| Initial  | p = 0.6115        |                   |            |                   |
| Mixed    | p = 0.3557        | p = 0.1732        |            |                   |
| Seed     | p = 0.3420        | p = 0.5222        | p = 0.2995 |                   |
| Mealworm | <b>p = 0.0021</b> | <b>p = 0.0002</b> | p = 0.2129 | <b>p = 0.0082</b> |
|          | Reversed          | Initial           | Mixed      | Seed              |
