# Supplementary material for: Flexibility and resilience of great tit (Parus major) gut microbiomes to changing diets
Source: PubMed Central journal article supplement (PMC7893775; doi:10.1186/s42523-021-00076-6), 2021-02-18
Supplement: 42523_2021_76_MOESM9_ESM.pdf [file 42523_2021_76_MOESM9_ESM.pdf]

## Mixed diet

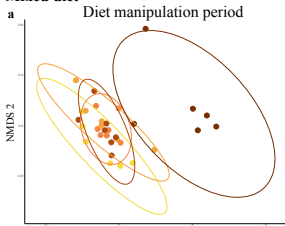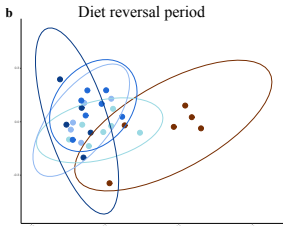

## Seed diet

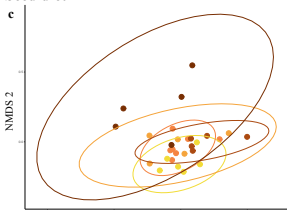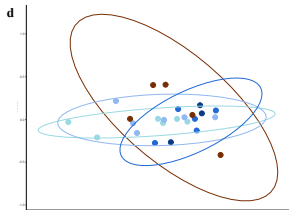

## Mealworm diet

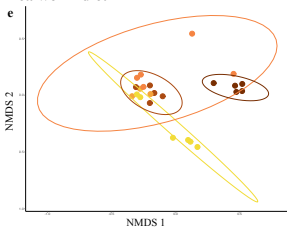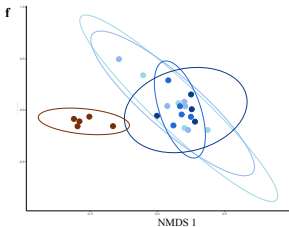

● Week 1 – Initial communities  
● Week 2  
● Week 3 } Diet manipulation period  
● Week 4  
● Week 5 – After diet manipulation

● Week 6 } Diet reversal period  
● Week 7  
● Week 8  
● Week 9 – After diet reversal
